# Supplementary material for: Targeting PI3K and AMPKα Signaling Alone or in Combination to Enhance Radiosensitivity of Triple Negative Breast Cancer
Source: PubMed Central journal article supplement (PMC7291172; doi:10.3390/cells9051253), 2020-05-19
Supplement: cells-09-01253-s001.pdf [file cells-09-01253-s001.pdf]

**Targeting PI3K and AMPK $\alpha$  Signaling Alone or in Combination to Enhance  
Radiosensitivity of Triple Negative Breast Cancer**

Jeremy Johnson <sup>1</sup>, Zeta Chow <sup>2,3</sup>, Dana Napier <sup>2</sup>, Eun Lee <sup>4</sup>, Heidi L. Weiss <sup>2</sup>,

B. Mark Evers <sup>2,3</sup> and Piotr Rychahou <sup>2,3,†</sup>

<sup>1</sup>Department of Toxicology and Cancer Biology, <sup>2</sup>Markey Cancer Center, <sup>3</sup>Department of Surgery, <sup>4</sup>Department of Pathology and Laboratory Medicine, Lexington, KY 40536, USA

**†Corresponding Author:** Piotr Rychahou, M.D., University of Kentucky, Markey Cancer Center, 760 Press Ave, HKRB 322, Lexington, KY 40536, (859) 323-9285,

[piotr.rychahou@uky.edu](mailto:piotr.rychahou@uky.edu)

**SUPPLEMENTARY MATERIALS**

Figures S1-S4 contain graphs and IHC staining that is referenced in the manuscript.

Data Tables S1-S5 contain data that was used for calculations in the manuscript.

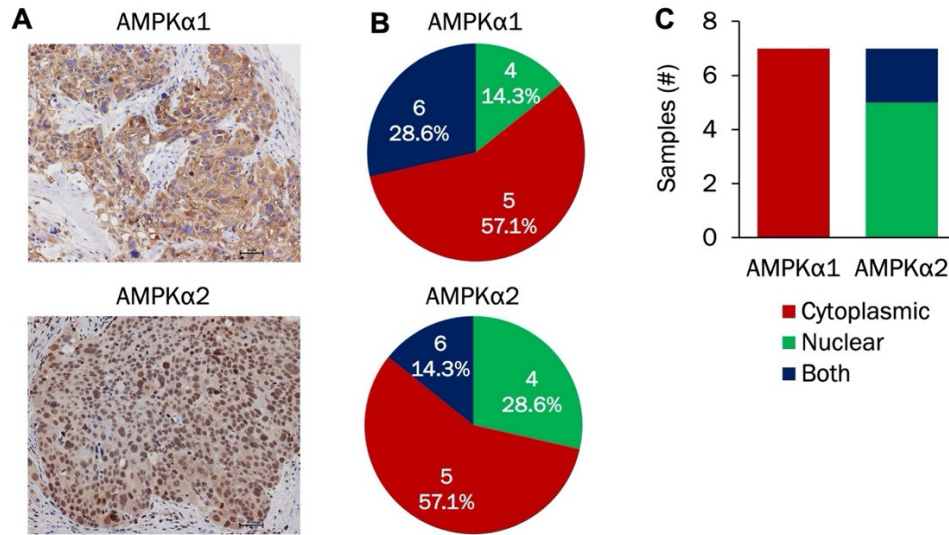

**Figure S1. Analysis of AMPK $\alpha$ 1 and AMPK $\alpha$ 2 expression in TNBC PDX samples. (A)** Representative IHC staining of AMPK $\alpha$ 1 and AMPK $\alpha$ 2 in TNBC PDX samples. **(B)** Scoring distribution of AMPK $\alpha$ 1 and AMPK $\alpha$ 2 in TNBC PDX samples ( $n = 7$ ). **(C)** Subcellular localization (nuclear, cytoplasmic, or both) of AMPK $\alpha$ 1 and AMPK $\alpha$ 2 in TNBC PDX samples ( $n = 7$ ).

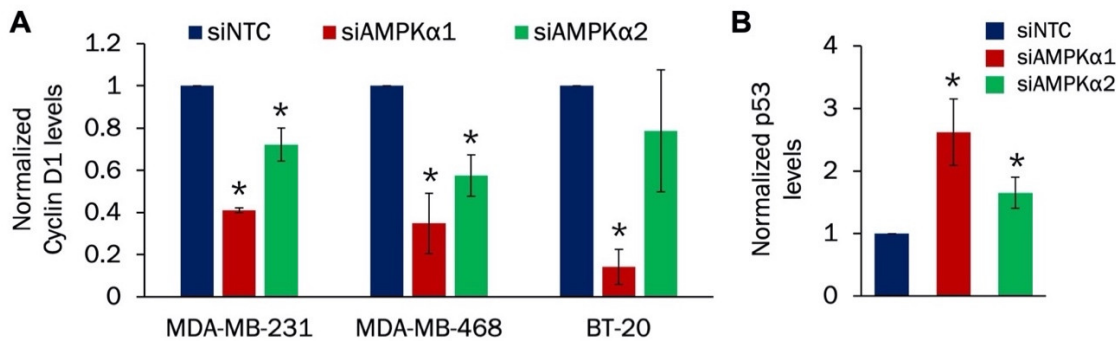

**Figure S2. Densitometry measurements of cyclin D1 and p53 after AMPK $\alpha$ 1 or AMPK $\alpha$ 2 knockdown in TNBC cells. (A)** MDA-MB-231, MDA-MB-468, and BT-20 cells were transfected with 50 nM of siRNA targeting AMPK $\alpha$ 1 or AMPK $\alpha$ 2. Expression of cyclin D1 was analyzed by western blot densitometry 72h after transfection ( $n = 3$ ). **(B)** MDA-MB-231 cells were transfected with 50 nM of siRNA targeting AMPK $\alpha$ 1 or AMPK $\alpha$ 2. Expression of p53 was analyzed by western blot densitometry 72h after transfection ( $n = 3$ ). \*indicates  $p$ -value  $< 0.05$ ; NTC, Non-targeting control was used as a negative control.

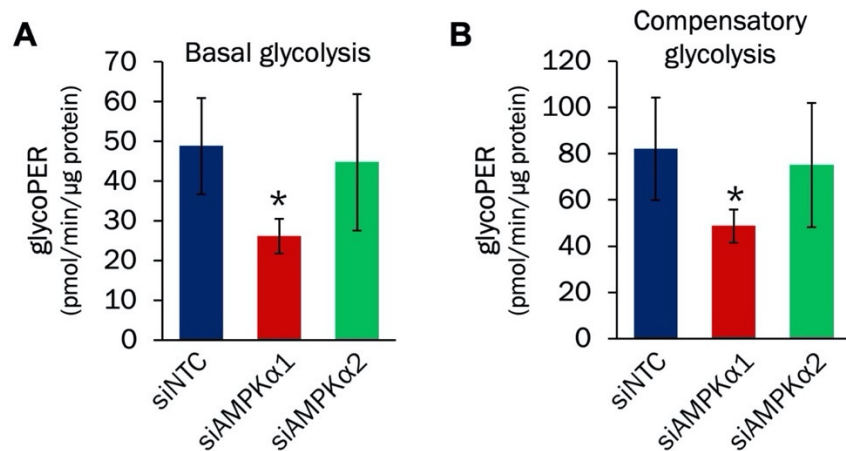

**Figure S3. Effect of AMPK $\alpha$ 1 or AMPK $\alpha$ 2 knockdown on basal and compensatory glycolysis in MDA-MB-231 cells.** MDA-MB-231 cells were transfected with 50 nM of siRNA targeting AMPK $\alpha$ 1 or AMPK $\alpha$ 2. Non-targeting control was used as a negative control. Cells were seeded at a density of 20,000 cells/well 48h after transfection, and the rates of (A) basal and (B) compensatory glycolysis were determined 24h later ( $n = 18$ ). The results are representative of 2 independent experiments. \*indicates  $p$ -value  $< 0.0001$ .

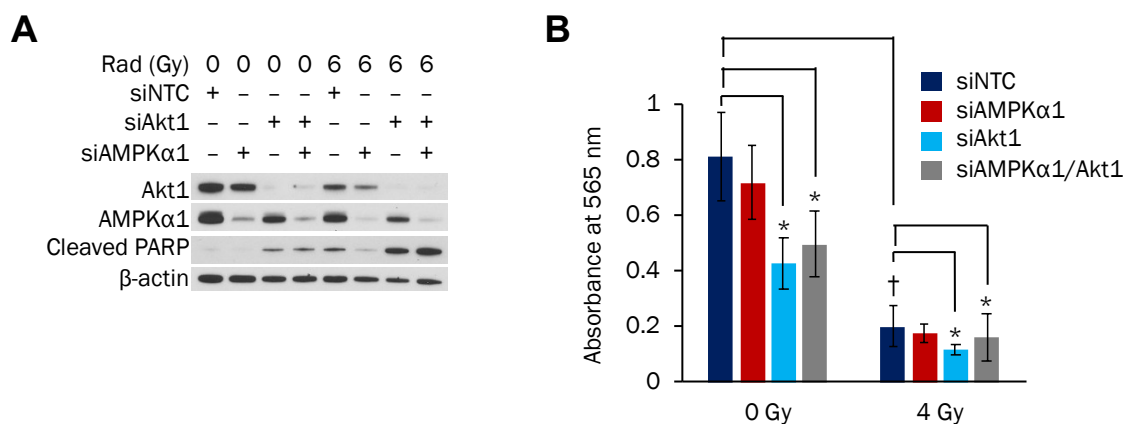

**Figure S4. Silencing Akt1 enhances radiation-induced apoptosis in MDA-MB-231 cells.** (A) MDA-MB-231 cells were transfected with siRNA to AMPK $\alpha$ 1, Akt1, or AMPK $\alpha$ 1/Akt1. Transfection concentrations were: (1) individual siRNA: 50 nM, (2) combination siRNA: 50 nM each (100 nM total), and (3) NTC: 100 nM. Cells were exposed to 0 or 6 Gy radiation dose 24h after transfection and collected 48h after radiation. Expression of AMPK $\alpha$ 1, Akt1, and cleaved PARP was determined by western blot. (B) MDA-MB-231 cells were transfected with siRNA to AMPK $\alpha$ 1, Akt1, or AMPK $\alpha$ 1/Akt1. Transfection concentrations were: (1) individual siRNA: 50 nM, (2) combination siRNA: 50 nM each (100 nM total), and (3) NTC: 100 nM. Cells were

seeded at a density of 100 cells/well into 96-well plates 48h after transfection. Cells were exposed to 0 or 4 Gy radiation dose 24h later. Colonies were fixed and quantified with the SRB assay protocol 1 week after irradiation ( $n = 18$ ). NTC, Non-targeting control was used as a negative control. \*indicates  $p < 0.01$  vs. group control; † indicates  $p < 0.0001$  vs. no radiation.

**Data Table S1. Western blot data used for densitometry calculations in paper.**

| Data Table S1. Western blot data used for densitometry calculations in paper. |       |             |            |                      |       |            |            |                      |       |            |            |
|-------------------------------------------------------------------------------|-------|-------------|------------|----------------------|-------|------------|------------|----------------------|-------|------------|------------|
| MDA-MB-231 Cells                                                              |       |             |            | MDA-MB-468 Cells     |       |            |            | BT-20 Cells          |       |            |            |
| Normalized Cyclin D1                                                          |       |             |            | Normalized Cyclin D1 |       |            |            | Normalized Cyclin D1 |       |            |            |
|                                                                               | siNTC | siAMPKα1    | siAMPKα2   |                      | siNTC | siAMPKα1   | siAMPKα2   |                      | siNTC | siAMPKα1   | siAMPKα2   |
| Rep 1                                                                         | 1     | 0.42207499  | 0.80997237 | Rep 1                | 1     | 0.24249245 | 0.48132773 | Rep 1                | 1     | 0.05161267 | 0.78855112 |
| Rep 2                                                                         | 1     | 0.407942915 | 0.69800853 | Rep 2                | 1     | 0.29001615 | 0.56460761 | Rep 2                | 1     | 0.21674908 | 1.07579107 |
| Rep 3                                                                         | 1     | 0.399301194 | 0.6577587  | Rep 3                | 1     | 0.51194717 | 0.67725438 | Rep 3                | 1     | 0.15322177 | 0.49636264 |
| Normalized p53                                                                |       |             |            |                      |       |            |            |                      |       |            |            |
|                                                                               | siNTC | siAMPKα1    | siAMPKα2   |                      |       |            |            |                      |       |            |            |
| Rep 1                                                                         | 1     | 3.05383243  | 1.86973381 |                      |       |            |            |                      |       |            |            |
| Rep 2                                                                         | 1     | 2.780327811 | 1.71017351 |                      |       |            |            |                      |       |            |            |
| Rep 3                                                                         | 1     | 2.031290802 | 1.37851921 |                      |       |            |            |                      |       |            |            |

**Data Table S2. Basal and compensatory glycolysis data used for calculations in paper.**

| Data Table S2. Basal and compensatory glycolysis data used for calculations in paper. |          |          |                                                             |          |          |  |  |  |
|---------------------------------------------------------------------------------------|----------|----------|-------------------------------------------------------------|----------|----------|--|--|--|
| Basal Glycolysis (pmol/min)<br>Normalized to Protein                                  |          |          | Compensatory Glycolysis<br>(pmol/min) Normalized to Protein |          |          |  |  |  |
| siNTC                                                                                 | siAMPKα1 | siAMPKα2 | siNTC                                                       | siAMPKα1 | siAMPKα2 |  |  |  |
| 39.757                                                                                | 26.270   | 49.452   | 75.048                                                      | 54.395   | 80.078   |  |  |  |
| 35.704                                                                                | 29.472   | 43.687   | 61.667                                                      | 53.728   | 69.214   |  |  |  |
| 35.005                                                                                | 36.071   | 75.691   | 59.746                                                      | 65.136   | 127.037  |  |  |  |
| 52.317                                                                                | 21.988   | 37.145   | 85.600                                                      | 44.852   | 62.676   |  |  |  |
| 35.670                                                                                | 25.915   | 34.467   | 62.588                                                      | 45.060   | 67.187   |  |  |  |
| 36.571                                                                                | 27.885   | 46.620   | 68.281                                                      | 52.579   | 70.114   |  |  |  |
| 56.372                                                                                | 22.188   | 51.353   | 95.911                                                      | 37.083   | 82.375   |  |  |  |
| 41.575                                                                                | 24.592   | 31.961   | 41.101                                                      | 44.570   | 50.939   |  |  |  |
| 38.938                                                                                | 26.279   | 40.141   | 67.702                                                      | 48.317   | 67.357   |  |  |  |
| 55.327                                                                                | 23.724   | 91.778   | 96.115                                                      | 43.631   | 151.227  |  |  |  |
| 57.050                                                                                | 32.007   | 23.021   | 93.248                                                      | 55.723   | 38.091   |  |  |  |
| 58.685                                                                                | 33.598   | 44.753   | 94.672                                                      | 58.125   | 74.312   |  |  |  |
| 48.206                                                                                | 22.931   | 48.244   | 86.205                                                      | 40.909   | 78.137   |  |  |  |
| 56.313                                                                                | 19.778   | 25.377   | 81.919                                                      | 41.546   | 47.238   |  |  |  |
| 42.964                                                                                | 27.575   | 31.796   | 73.923                                                      | 51.058   | 61.436   |  |  |  |
| 42.894                                                                                | 25.092   | 59.557   | 77.372                                                      | 51.531   | 91.670   |  |  |  |
| 67.971                                                                                | 21.618   | 33.194   | 123.878                                                     | 45.730   | 66.763   |  |  |  |
| 77.320                                                                                | 23.762   | 37.468   | 131.254                                                     | 41.653   | 66.342   |  |  |  |

Data Table S3. Proliferation assay data used for calculations in paper.

| Data Table S3. Proliferation assay data used for calculations in paper. |                         |                   |          |                         |                   |          |                         |                   |
|-------------------------------------------------------------------------|-------------------------|-------------------|----------|-------------------------|-------------------|----------|-------------------------|-------------------|
|                                                                         | Viable cells            | Viable cells      |          | Viable cells            | Viable cells      |          | Viable cells            | Viable cells      |
|                                                                         | /ml (x10 <sup>6</sup> ) | relative to siNTC |          | /ml (x10 <sup>6</sup> ) | relative to siNTC |          | /ml (x10 <sup>6</sup> ) | relative to siNTC |
| siNTC                                                                   | 1.04                    | 103.9170776       | siAMPKα1 | 0.59                    | 59.22782154       | siAMPKα2 | 0.44                    | 44.09728361       |
| siNTC                                                                   | 1.05                    | 105.1211074       | siAMPKα1 | 0.64                    | 64.39508242       | siAMPKα2 | 0.40                    | 40.37485197       |
| siNTC                                                                   | 0.98                    | 98.14781374       | siAMPKα1 | 0.57                    | 57.4318239        | siAMPKα2 | 0.37                    | 37.24439708       |
| siNTC                                                                   | 0.94                    | 93.94377435       | siAMPKα1 | 0.63                    | 63.08068955       | siAMPKα2 | 0.44                    | 43.73607705       |
| siNTC                                                                   | 0.99                    | 98.87022687       | siAMPKα1 | 0.63                    | 63.08068955       | siAMPKα2 | 0.46                    | 46.61569737       |
|                                                                         | Average                 |                   |          |                         |                   |          |                         |                   |
| siNTC                                                                   | 1.00                    |                   |          |                         |                   |          |                         |                   |

Data Table S4. SRB assay data used for calculations in paper.

| Data Table S4. SRB assay data used for calculations in paper. |       |          |          |        |         |               |                |               |                |  |
|---------------------------------------------------------------|-------|----------|----------|--------|---------|---------------|----------------|---------------|----------------|--|
|                                                               | siNTC | siAMPKα1 | siAMPKα2 | siAkt1 | siP110α | siAMPKα1/Akt1 | siAMPKα1/p110α | siAMPKα2/Akt1 | siAMPKα2/p110α |  |
|                                                               | 0.605 | 0.516    | 0.442    | 0.435  | 0.472   | 0.446         | 0.312          | 0.398         | 0.443          |  |
|                                                               | 0.661 | 0.538    | 0.434    | 0.481  | 0.43    | 0.455         | 0.337          | 0.428         | 0.475          |  |
|                                                               | 0.64  | 0.55     | 0.503    | 0.532  | 0.491   | 0.471         | 0.361          | 0.437         | 0.541          |  |
|                                                               | 0.649 | 0.493    | 0.481    | 0.484  | 0.453   | 0.494         | 0.348          | 0.449         | 0.5            |  |
|                                                               | 0.656 | 0.502    | 0.476    | 0.529  | 0.446   | 0.461         | 0.337          | 0.52          | 0.541          |  |
|                                                               | 0.717 | 0.52     | 0.434    | 0.478  | 0.449   | 0.418         | 0.328          | 0.452         | 0.525          |  |
|                                                               | 0.694 | 0.584    | 0.481    | 0.418  | 0.488   | 0.43          | 0.306          | 0.43          | 0.451          |  |
|                                                               | 0.71  | 0.512    | 0.396    | 0.453  | 0.498   | 0.431         | 0.339          | 0.456         | 0.456          |  |
|                                                               | 0.716 | 0.55     | 0.49     | 0.481  | 0.564   | 0.439         | 0.3            | 0.441         | 0.482          |  |
|                                                               | 0.724 | 0.578    | 0.453    | 0.531  | 0.513   | 0.442         | 0.292          | 0.421         | 0.458          |  |
| Absorbance at 565 nm                                          | 0.745 | 0.595    | 0.48     | 0.537  | 0.464   | 0.436         | 0.316          | 0.453         | 0.44           |  |
|                                                               | 0.699 | 0.543    | 0.433    | 0.562  | 0.492   | 0.394         | 0.295          | 0.422         | 0.516          |  |

Data Table S5. Colony formation SRB assay data used for calculations in paper.

| Data Table S5. Colony formation SRB assay data used for calculations in paper. |        |          |        |               |        |          |        |               |  |  |
|--------------------------------------------------------------------------------|--------|----------|--------|---------------|--------|----------|--------|---------------|--|--|
|                                                                                | 0 Gray |          |        |               | 4 Gray |          |        |               |  |  |
|                                                                                | siNTC  | siAMPKα1 | siAkt1 | siAMPKα1/Akt1 | siNTC  | siAMPKα1 | siAkt1 | siAMPKα1/Akt1 |  |  |
|                                                                                | 0.843  | 0.635    | 0.457  | 0.556         | 0.143  | 0.193    | 0.151  | 0.124         |  |  |
|                                                                                | 1.017  | 0.871    | 0.342  | 0.496         | 0.206  | 0.162    | 0.148  | 0.086         |  |  |
|                                                                                | 0.848  | 0.771    | 0.5    | 0.395         | 0.19   | 0.106    | 0.113  | 0.116         |  |  |
|                                                                                | 0.974  | 0.648    | 0.414  | 0.337         | 0.157  | 0.164    | 0.108  | 0.1           |  |  |
|                                                                                | 0.729  | 0.665    | 0.431  | 0.353         | 0.233  | 0.192    | 0.14   | 0.161         |  |  |
|                                                                                | 1.176  | 0.748    | 0.599  | 0.44          | 0.429  | 0.215    | 0.109  | 0.399         |  |  |
|                                                                                | 0.822  | 0.619    | 0.38   | 0.571         | 0.172  | 0.228    | 0.118  | 0.143         |  |  |
|                                                                                | 0.592  | 0.494    | 0.427  | 0.447         | 0.2    | 0.174    | 0.128  | 0.121         |  |  |
|                                                                                | 0.67   | 0.75     | 0.386  | 0.422         | 0.18   | 0.165    | 0.113  | 0.122         |  |  |
|                                                                                | 0.805  | 0.48     | 0.318  | 0.423         | 0.237  | 0.137    | 0.122  | 0.221         |  |  |
|                                                                                | 0.929  | 0.887    | 0.338  | 0.563         | 0.246  | 0.182    | 0.092  | 0.331         |  |  |
|                                                                                | 0.956  | 0.753    | 0.473  | 0.478         | 0.264  | 0.153    | 0.099  | 0.169         |  |  |
|                                                                                | 0.825  | 0.964    | 0.432  | 0.761         | 0.196  | 0.139    | 0.134  | 0.15          |  |  |
|                                                                                | 0.597  | 0.652    | 0.518  | 0.494         | 0.12   | 0.154    | 0.087  | 0.092         |  |  |
|                                                                                | 0.714  | 0.872    | 0.304  | 0.443         | 0.132  | 0.227    | 0.083  | 0.104         |  |  |
|                                                                                | 0.62   | 0.564    | 0.646  | 0.563         | 0.122  | 0.191    | 0.105  | 0.116         |  |  |
| Absorbance at 565 nm                                                           | 0.744  | 0.772    | 0.338  | 0.4           | 0.152  | 0.158    | 0.119  | 0.089         |  |  |
|                                                                                | 0.679  | 0.737    | 0.358  | 0.768         | 0.222  | 0.169    | 0.09   | 0.196         |  |  |
